# Supplementary material
Source: PubMed Central journal article supplement (PMC8578258)

**Cr****Olfactory bulb**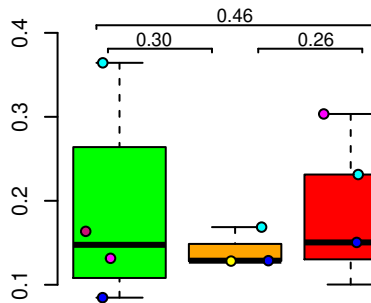**Anterior frontal cortex**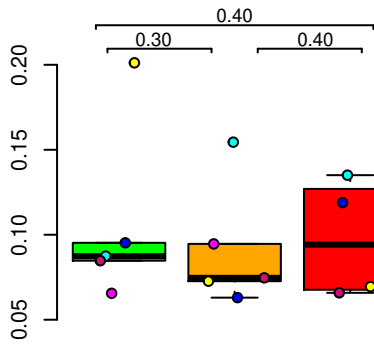**Motor-somatosensory cortex**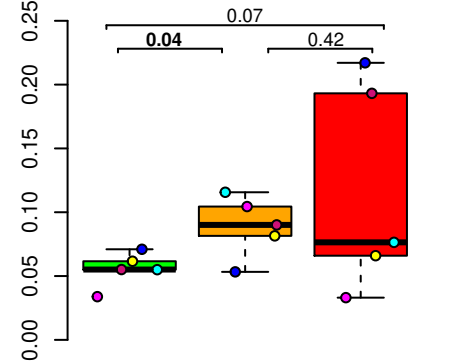**Striatum**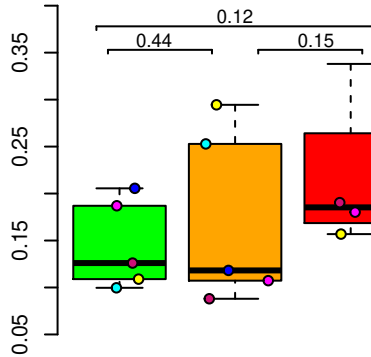**Ventral midbrain**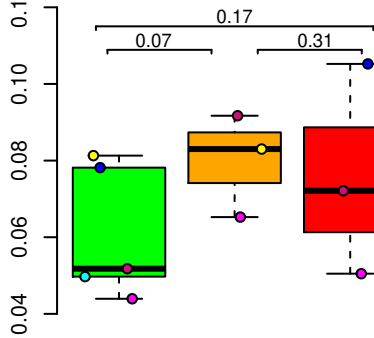**Cerebellum**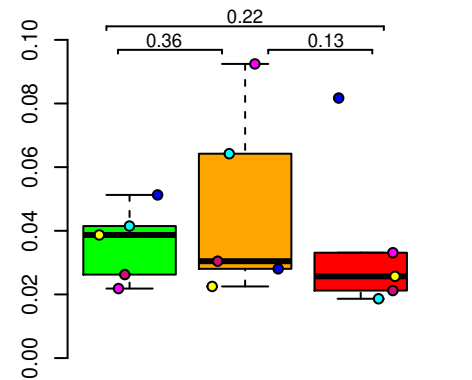**Brainstem**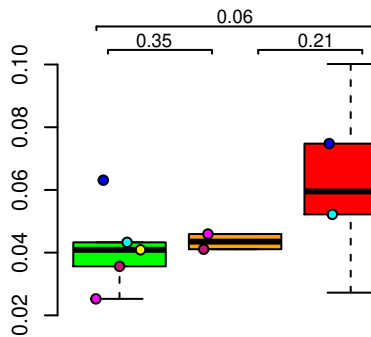**Spinal cord**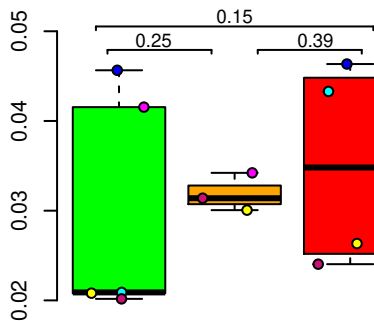**Remaining brain tissue**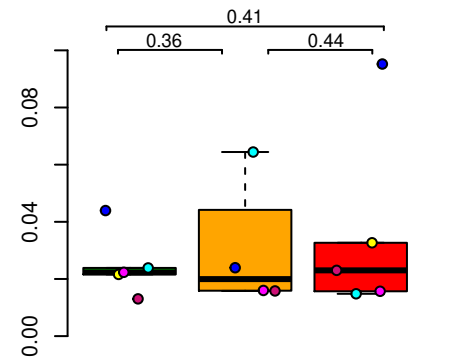

Supplement: NIHMS1723636-supplement-Fig_S6b.pdf [file NIHMS1723636-supplement-Fig_S6b.pdf]
