# Supplementary material
Source: PubMed Central journal article supplement (PMC8578258)

# Mn

## Olfactory bulb

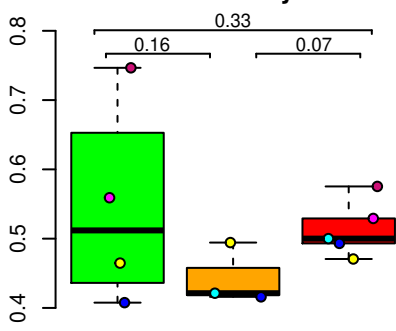

## Anterior frontal cortex

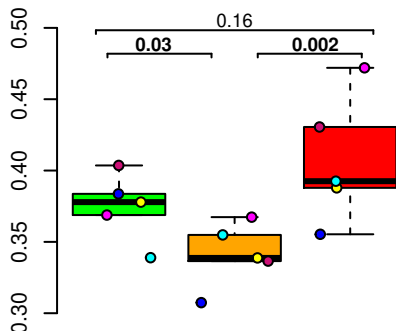

## Motor-somatosensory cortex

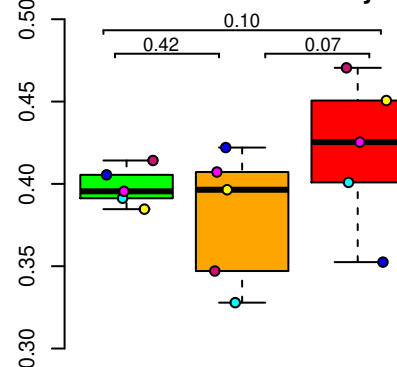

## Striatum

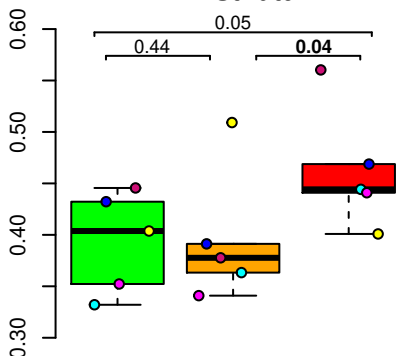

## Ventral midbrain

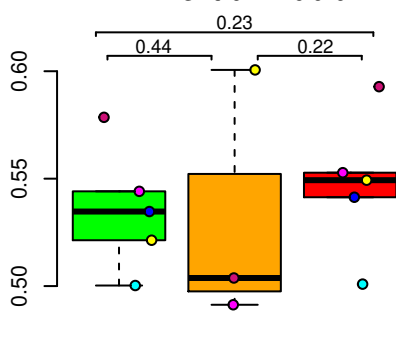

## Cerebellum

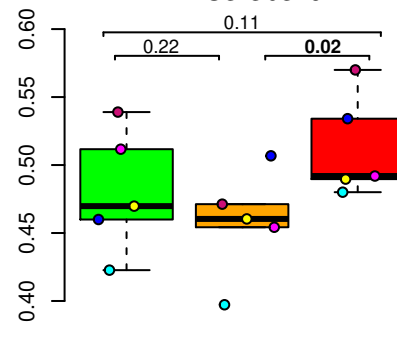

## Brainstem

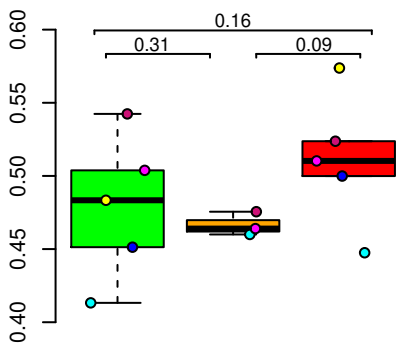

## Spinal cord

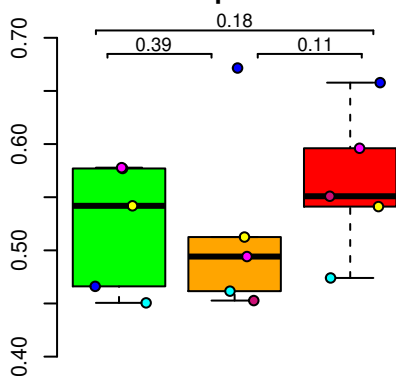

## Remaining brain tissue

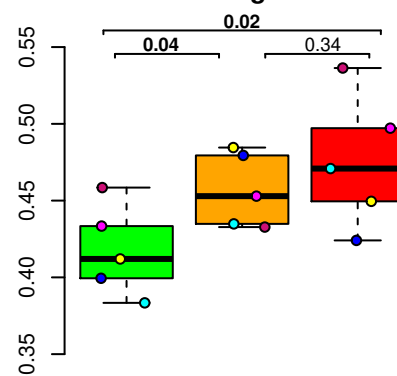

Supplement: NIHMS1723636-supplement-Fig_S8a.pdf [file NIHMS1723636-supplement-Fig_S8a.pdf]
