# Supplementary material
Source: PubMed Central journal article supplement (PMC8578258)
Supplement: NIHMS1723636-supplement-Table_S1.pdf [file NIHMS1723636-supplement-Table_S1.pdf]

|                      | As    | Cr     | Cu   | Fe   | Mn     | Ni    | Pb     | Sb    | Se   | Sn    | Sr     | Tl     | V      | W      | Zn   |
|----------------------|-------|--------|------|------|--------|-------|--------|-------|------|-------|--------|--------|--------|--------|------|
| <b>Brain tissues</b> |       |        |      |      |        |       |        |       |      |       |        |        |        |        |      |
| MDL (µg/L)           | 0.002 | 0.0006 | 0.06 | 0.02 | 0.0005 | 0.002 | 0.0009 | 0.002 | 0.03 | 0.003 | 0.0007 | 0.0004 | 0.0006 | 0.0008 | 0.05 |
| # < MDL              | 0     | 0      | 0    | 0    | 0      | 0     | 0      | 7     | 0    | 67    | 0      | 1      | 0      | 111    | 0    |
| MQL (µg/L)           | 0.005 | 0.002  | 0.2  | 0.06 | 0.001  | 0.006 | 0.003  | 0.006 | 0.1  | 0.010 | 0.002  | 0.001  | 0.002  | 0.003  | 0.2  |
| # < MQL              | 0     | 0      | 0    | 0    | 0      | 0     | 2      | 71    | 0    | 108   | 0      | 39     | 42     | 125    | 0    |
| <b>Blood</b>         |       |        |      |      |        |       |        |       |      |       |        |        |        |        |      |
| MDL (µg/L)           | 0.3   | 0.5    | 2    | 4    | 0.4    | 0.7   | 0.2    | 0.09  | 2    | 0.4   | 0.4    | 0.06   | 0.07   | 0.1    | 17   |
| # < MDL              | 0     | 0      | 0    | 0    | 0      | 0     | 0      | 0     | 0    | 15    | 0      | 10     | 0      | 9      | 0    |
| MQL (µg/L)           | 1.0   | 1.5    | 7    | 13   | 1.2    | 2.1   | 0.7    | 0.27  | 7    | 1.1   | 1.2    | 0.18   | 0.21   | 0.4    | 50   |
| # < MQL              | 0     | 5      | 0    | 0    | 0      | 0     | 2      | 0     | 0    | 15    | 0      | 15     | 0      | 15     | 0    |

MDLs were determined by spiking blanks with known metal concentrations close to the estimated MDL. MQLs were assumed to be three times the MDL values.
