# Supplementary material
Source: PubMed Central journal article supplement (PMC8578258)
Supplement: NIHMS1723636-supplement-Table_S3.pdf [file NIHMS1723636-supplement-Table_S3.pdf]

|                        | PC1          | PC2          | PC3          | PC4          | PC5          |
|------------------------|--------------|--------------|--------------|--------------|--------------|
| <b>Olfactory bulb</b>  |              |              |              |              |              |
| Variance (%)           | 35.7         | 27.6         | 18.2         | 9.8          | 6.4          |
| <b>Rotation matrix</b> |              |              |              |              |              |
| As                     | -0.25        | -0.10        | -0.22        | <b>-0.79</b> | 0.25         |
| Cr                     | -0.28        | <b>0.46</b>  | 0.10         | -0.04        | <b>-0.31</b> |
| Cu                     | <b>-0.45</b> | -0.07        | <b>-0.35</b> | -0.14        | -0.05        |
| Fe                     | <b>-0.39</b> | <b>-0.34</b> | -0.11        | 0.13         | -0.29        |
| Mn                     | <b>-0.44</b> | 0.00         | -0.30        | <b>0.36</b>  | -0.19        |
| Ni                     | 0.02         | <b>0.49</b>  | 0.13         | -0.26        | <b>-0.56</b> |
| Pb                     | -0.29        | <b>0.43</b>  | 0.19         | -0.07        | <b>0.41</b>  |
| Se                     | <b>-0.42</b> | 0.09         | <b>0.33</b>  | 0.27         | <b>0.34</b>  |
| Sr                     | -0.10        | <b>-0.42</b> | <b>0.42</b>  | -0.23        | <b>-0.35</b> |
| Zn                     | -0.21        | -0.21        | <b>0.62</b>  | -0.06        | 0.02         |
| <b>Median Score</b>    |              |              |              |              |              |
| Control                | 1.26         | -2.32        | 2.53         | -0.29        | -0.12        |
| Low dose               | 1.49         | 0.75         | -0.66        | -0.15        | -0.45        |
| High dose              | -1.43        | 0.28         | 0.14         | 0.54         | -0.27        |

### Anterior frontal cortex

|                                | PC1          | PC2          | PC3          | PC4          | PC5          |
|--------------------------------|--------------|--------------|--------------|--------------|--------------|
| <b>Anterior frontal cortex</b> |              |              |              |              |              |
| Variance (%)                   | 43.8         | 17.5         | 16.1         | 7.0          | 6.2          |
| <b>Rotation matrix</b>         |              |              |              |              |              |
| As                             | -0.28        | <b>-0.55</b> | -0.01        | -0.17        | <b>0.31</b>  |
| Cr                             | -0.27        | -0.23        | -0.21        | 0.24         | <b>-0.83</b> |
| Cu                             | <b>-0.40</b> | -0.11        | 0.24         | <b>0.32</b>  | 0.23         |
| Fe                             | <b>-0.40</b> | <b>0.33</b>  | 0.00         | -0.11        | 0.01         |
| Mn                             | <b>-0.36</b> | <b>0.32</b>  | -0.10        | 0.27         | -0.01        |
| Ni                             | 0.04         | -0.05        | <b>-0.71</b> | <b>-0.49</b> | -0.01        |
| Pb                             | 0.12         | <b>-0.33</b> | <b>-0.49</b> | <b>0.61</b>  | 0.30         |
| Se                             | <b>-0.45</b> | 0            | -0.12        | -0.23        | 0.21         |
| Sr                             | -0.03        | <b>-0.55</b> | <b>0.35</b>  | -0.23        | -0.18        |
| Zn                             | <b>-0.42</b> | -0.01        | -0.09        | -0.08        | 0.00         |
| <b>Median Score</b>            |              |              |              |              |              |
| Control                        | -0.21        | 0.39         | 0.29         | 0.5          | 0.33         |
| Low dose                       | 2.28         | -0.69        | -0.1         | 0.06         | 0.38         |
| High dose                      | -2.43        | 1.24         | 0.87         | -0.33        | 0.34         |

### Motor-somatosensory cortex

|                                   | PC1         | PC2          | PC3          | PC4          | PC5          |
|-----------------------------------|-------------|--------------|--------------|--------------|--------------|
| <b>Motor-somatosensory cortex</b> |             |              |              |              |              |
| Variance (%)                      | 30.7        | 22.1         | 18.2         | 12.6         | 7.0          |
| <b>Rotation matrix</b>            |             |              |              |              |              |
| As                                | 0.3         | <b>0.38</b>  | -0.03        | <b>0.51</b>  | -0.13        |
| Cr                                | 0.23        | 0.27         | <b>-0.41</b> | <b>-0.43</b> | -0.23        |
| Cu                                | 0.08        | <b>0.31</b>  | <b>-0.53</b> | <b>0.38</b>  | 0.09         |
| Fe                                | 0.30        | <b>-0.33</b> | <b>-0.43</b> | -0.14        | <b>0.33</b>  |
| Mn                                | 0.21        | <b>-0.49</b> | -0.21        | 0.22         | <b>0.40</b>  |
| Ni                                | <b>0.37</b> | 0.24         | -0.01        | <b>-0.53</b> | 0.04         |
| Pb                                | 0.19        | <b>0.46</b>  | 0.21         | 0.08         | <b>0.59</b>  |
| Se                                | <b>0.49</b> | -0.20        | 0.03         | 0.07         | <b>-0.33</b> |
| Sr                                | <b>0.32</b> | -0.03        | <b>0.47</b>  | -0.12        | 0.29         |
| Zn                                | <b>0.46</b> | -0.15        | 0.25         | 0.21         | <b>-0.34</b> |
| <b>Median Score</b>               |             |              |              |              |              |
| Control                           | -0.45       | -0.66        | -0.05        | 0.76         | -0.56        |
| Low dose                          | -1.26       | 1.11         | 0.06         | -0.52        | 0.61         |
| High dose                         | 0.32        | -0.37        | 0.01         | 0.32         | 0.13         |

### Striatum

|                        | PC1         | PC2          | PC3          | PC4          | PC5          |
|------------------------|-------------|--------------|--------------|--------------|--------------|
| <b>Striatum</b>        |             |              |              |              |              |
| Variance (%)           | 60.0        | 16.7         | 9.9          | 5.5          | 3.5          |
| <b>Rotation matrix</b> |             |              |              |              |              |
| As                     | 0.30        | <b>0.38</b>  | <b>0.38</b>  | -0.05        | <b>0.39</b>  |
| Cr                     | <b>0.36</b> | 0.16         | <b>-0.40</b> | 0.15         | 0.05         |
| Cu                     | <b>0.35</b> | -0.11        | <b>0.31</b>  | 0.03         | -0.30        |
| Fe                     | 0.29        | <b>-0.37</b> | <b>0.41</b>  | 0.07         | <b>-0.37</b> |
| Mn                     | 0.23        | <b>-0.57</b> | 0.08         | 0.05         | <b>0.39</b>  |
| Ni                     | <b>0.36</b> | 0.25         | -0.26        | 0.22         | 0.18         |
| Pb                     | <b>0.35</b> | 0.13         | -0.27        | 0.26         | <b>-0.54</b> |
| Se                     | <b>0.34</b> | -0.30        | -0.14        | 0.17         | <b>0.37</b>  |
| Sr                     | 0.29        | <b>0.40</b>  | <b>0.38</b>  | -0.28        | 0.03         |
| Zn                     | 0.27        | -0.15        | <b>-0.35</b> | <b>-0.86</b> | -0.09        |
| <b>Median Score</b>    |             |              |              |              |              |
| Control                | -1.25       | -0.62        | -0.59        | 0.42         | 0.22         |
| Low dose               | -1.01       | 0.74         | 0.81         | -0.16        | -0.17        |
| High dose              | 2.1         | -0.34        | -0.12        | 0.49         | 0.16         |

|                         | PC1         | PC2          | PC3          | PC4          | PC5          |
|-------------------------|-------------|--------------|--------------|--------------|--------------|
| <b>Ventral midbrain</b> |             |              |              |              |              |
| Variance (%)            | 36.0        | 21.7         | 16.0         | 14.9         | 6.8          |
| <b>Rotation matrix</b>  |             |              |              |              |              |
| As                      | 0.26        | <b>-0.41</b> | 0.13         | <b>0.42</b>  | <b>0.36</b>  |
| Cr                      | <b>0.36</b> | 0.16         | -0.11        | <b>-0.38</b> | <b>0.58</b>  |
| Cu                      | 0.28        | <b>-0.48</b> | 0.19         | <b>0.31</b>  | 0.08         |
| Fe                      | <b>0.44</b> | -0.10        | 0.06         | -0.22        | <b>-0.45</b> |
| Mn                      | 0.07        | <b>-0.51</b> | 0.13         | <b>-0.41</b> | -0.30        |
| Ni                      | <b>0.45</b> | -0.01        | -0.12        | <b>-0.39</b> | 0.17         |
| Pb                      | <b>0.40</b> | 0.23         | 0.03         | <b>0.37</b>  | -0.27        |
| Se                      | -0.15       | <b>-0.31</b> | <b>-0.62</b> | 0.10         | 0.20         |
| Sr                      | <b>0.37</b> | <b>0.39</b>  | -0.12        | 0.26         | -0.03        |
| Zn                      | 0.12        | -0.11        | <b>-0.71</b> | 0.07         | -0.30        |
| <b>Median Score</b>     |             |              |              |              |              |
| Control                 | -1.19       | -0.74        | -0.32        | 0.72         | -0.12        |
| Low dose                | 1.58        | 1.98         | -0.26        | 0.7          | -0.34        |
| High dose               | 1.08        | 0.09         | 1.5          | -1.45        | 0.45         |

### Cerebellum

|                        | PC1          | PC2         | PC3          | PC4          | PC5          |
|------------------------|--------------|-------------|--------------|--------------|--------------|
| <b>Cerebellum</b>      |              |             |              |              |              |
| Variance (%)           | 36.9         | 28.3        | 11.0         | 8.3          | 6.2          |
| <b>Rotation matrix</b> |              |             |              |              |              |
| As                     | -0.19        | <b>0.46</b> | <b>0.35</b>  | <b>-0.38</b> | 0.00         |
| Cr                     | <b>0.35</b>  | 0.26        | <b>-0.36</b> | <b>0.36</b>  | -0.25        |
| Cu                     | -0.24        | <b>0.45</b> | <b>0.33</b>  | -0.13        | -0.25        |
| Fe                     | <b>-0.33</b> | 0.07        | <b>-0.52</b> | -0.27        | <b>-0.55</b> |
| Mn                     | <b>-0.39</b> | -0.19       | -0.12        | -0.09        | 0.25         |
| Ni                     | <b>0.37</b>  | 0.26        | <b>0.34</b>  | 0.26         | -0.19        |
| Pb                     | <b>0.34</b>  | 0.28        | <b>-0.36</b> | <b>-0.35</b> | -0.07        |
| Se                     | <b>-0.33</b> | <b>0.36</b> | -0.13        | 0.30         | 0.19         |
| Sr                     | 0.28         | 0.30        | -0.23        | <b>-0.34</b> | <b>0.62</b>  |
| Zn                     | -0.29        | <b>0.35</b> | -0.22        | <b>0.48</b>  | 0.23         |
| <b>Median Score</b>    |              |             |              |              |              |
| Control                | -0.21        | 0.12        | 0.36         | -0.89        | 0.18         |
| Low dose               | 0.92         | 0.87        | -0.31        | 0.08         | -0.3         |
| High dose              | -1.27        | -0.39       | -0.12        | 0.57         | 0.11         |

### Brainstem

|                        | PC1          | PC2          | PC3          | PC4          | PC5          |
|------------------------|--------------|--------------|--------------|--------------|--------------|
| <b>Brainstem</b>       |              |              |              |              |              |
| Variance (%)           | 41.5         | 21.5         | 13.5         | 10.1         | 5.4          |
| <b>Rotation matrix</b> |              |              |              |              |              |
| As                     | <b>-0.36</b> | <b>0.36</b>  | 0.24         | <b>-0.31</b> | 0.02         |
| Cr                     | <b>-0.36</b> | <b>-0.36</b> | 0.04         | -0.22        | -0.23        |
| Cu                     | -0.26        | <b>0.48</b>  | 0.00         | <b>-0.32</b> | -0.10        |
| Fe                     | -0.28        | -0.17        | <b>-0.46</b> | <b>-0.41</b> | -0.17        |
| Mn                     | <b>-0.35</b> | -0.07        | <b>-0.33</b> | <b>0.47</b>  | <b>0.37</b>  |
| Ni                     | -0.12        | -0.11        | <b>0.77</b>  | 0.04         | 0.17         |
| Pb                     | -0.17        | <b>-0.56</b> | 0.17         | 0.08         | <b>-0.43</b> |
| Se                     | <b>-0.43</b> | 0.09         | 0.07         | 0.08         | 0.02         |
| Sr                     | -0.20        | <b>0.36</b>  | -0.01        | <b>0.57</b>  | <b>-0.61</b> |
| Zn                     | <b>-0.45</b> | -0.12        | -0.03        | 0.12         | <b>0.44</b>  |
| <b>Median Score</b>    |              |              |              |              |              |
| Control                | -0.21        | 0.8          | 0.64         | 0.3          | -0.37        |
| Low dose               | 1.88         | -0.53        | -0.61        | -0.12        | 0.05         |
| High dose              | -1.24        | -1.32        | -0.13        | -0.29        | 0.14         |

### Spinal cord

|                        | PC1         | PC2          | PC3          | PC4          | PC5          |
|------------------------|-------------|--------------|--------------|--------------|--------------|
| <b>Spinal cord</b>     |             |              |              |              |              |
| Variance (%)           | 47.7        | 27.2         | 13.2         | 5.3          | 3.7          |
| <b>Rotation matrix</b> |             |              |              |              |              |
| As                     | <b>0.36</b> | <b>-0.35</b> | 0.07         | 0.15         | 0.21         |
| Cr                     | 0.19        | <b>0.48</b>  | 0.28         | <b>0.31</b>  | -0.02        |
| Cu                     | <b>0.36</b> | <b>-0.33</b> | 0.05         | <b>0.36</b>  | 0.13         |
| Fe                     | <b>0.43</b> | 0.02         | -0.12        | <b>0.31</b>  | <b>0.38</b>  |
| Mn                     | 0.05        | -0.03        | 0.84         | 0.12         | <b>-0.35</b> |
| Ni                     | 0.29        | <b>0.41</b>  | 0.07         | <b>-0.39</b> | 0.28         |
| Pb                     | <b>0.36</b> | 0.30         | 0.07         | <b>-0.36</b> | 0.1          |
| Se                     | <b>0.33</b> | <b>-0.31</b> | -0.15        | -0.25        | <b>-0.42</b> |
| Sr                     | 0.16        | <b>0.41</b>  | <b>-0.41</b> | <b>0.44</b>  | <b>-0.52</b> |
| Zn                     | <b>0.41</b> | -0.11        | -0.05        | <b>-0.31</b> | <b>-0.38</b> |
| <b>Median Score</b>    |             |              |              |              |              |
| Control                | 0.25        | -1.71        | 0.38         | -0.29        | 0.14         |
| Low dose               | 0.25        | 0.97         | -0.9         | -0.58        | -0.01        |
| High dose              | -0.14       | 0.87         | 0.36         | 0.77         | 0.00         |
