# Supplementary material
Source: PubMed Central journal article supplement (PMC8578258)

Se

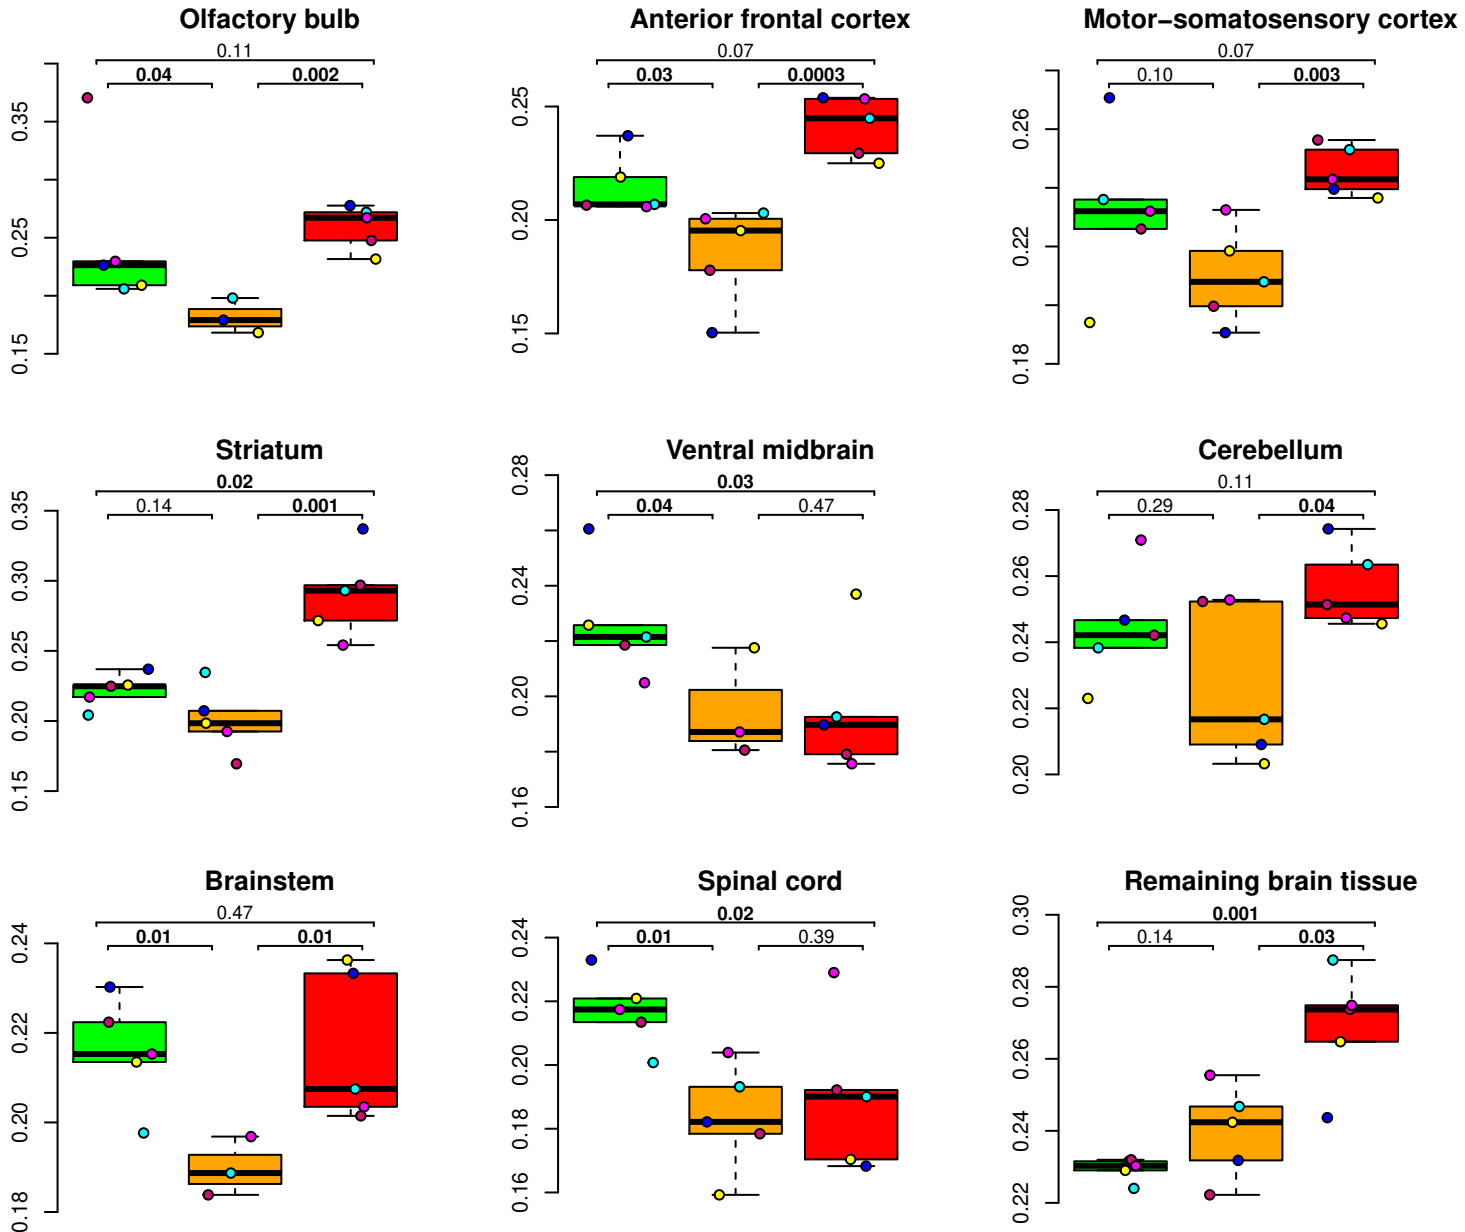

Supplement: NIHMS1723636-supplement-Fig_S10a.pdf [file NIHMS1723636-supplement-Fig_S10a.pdf]

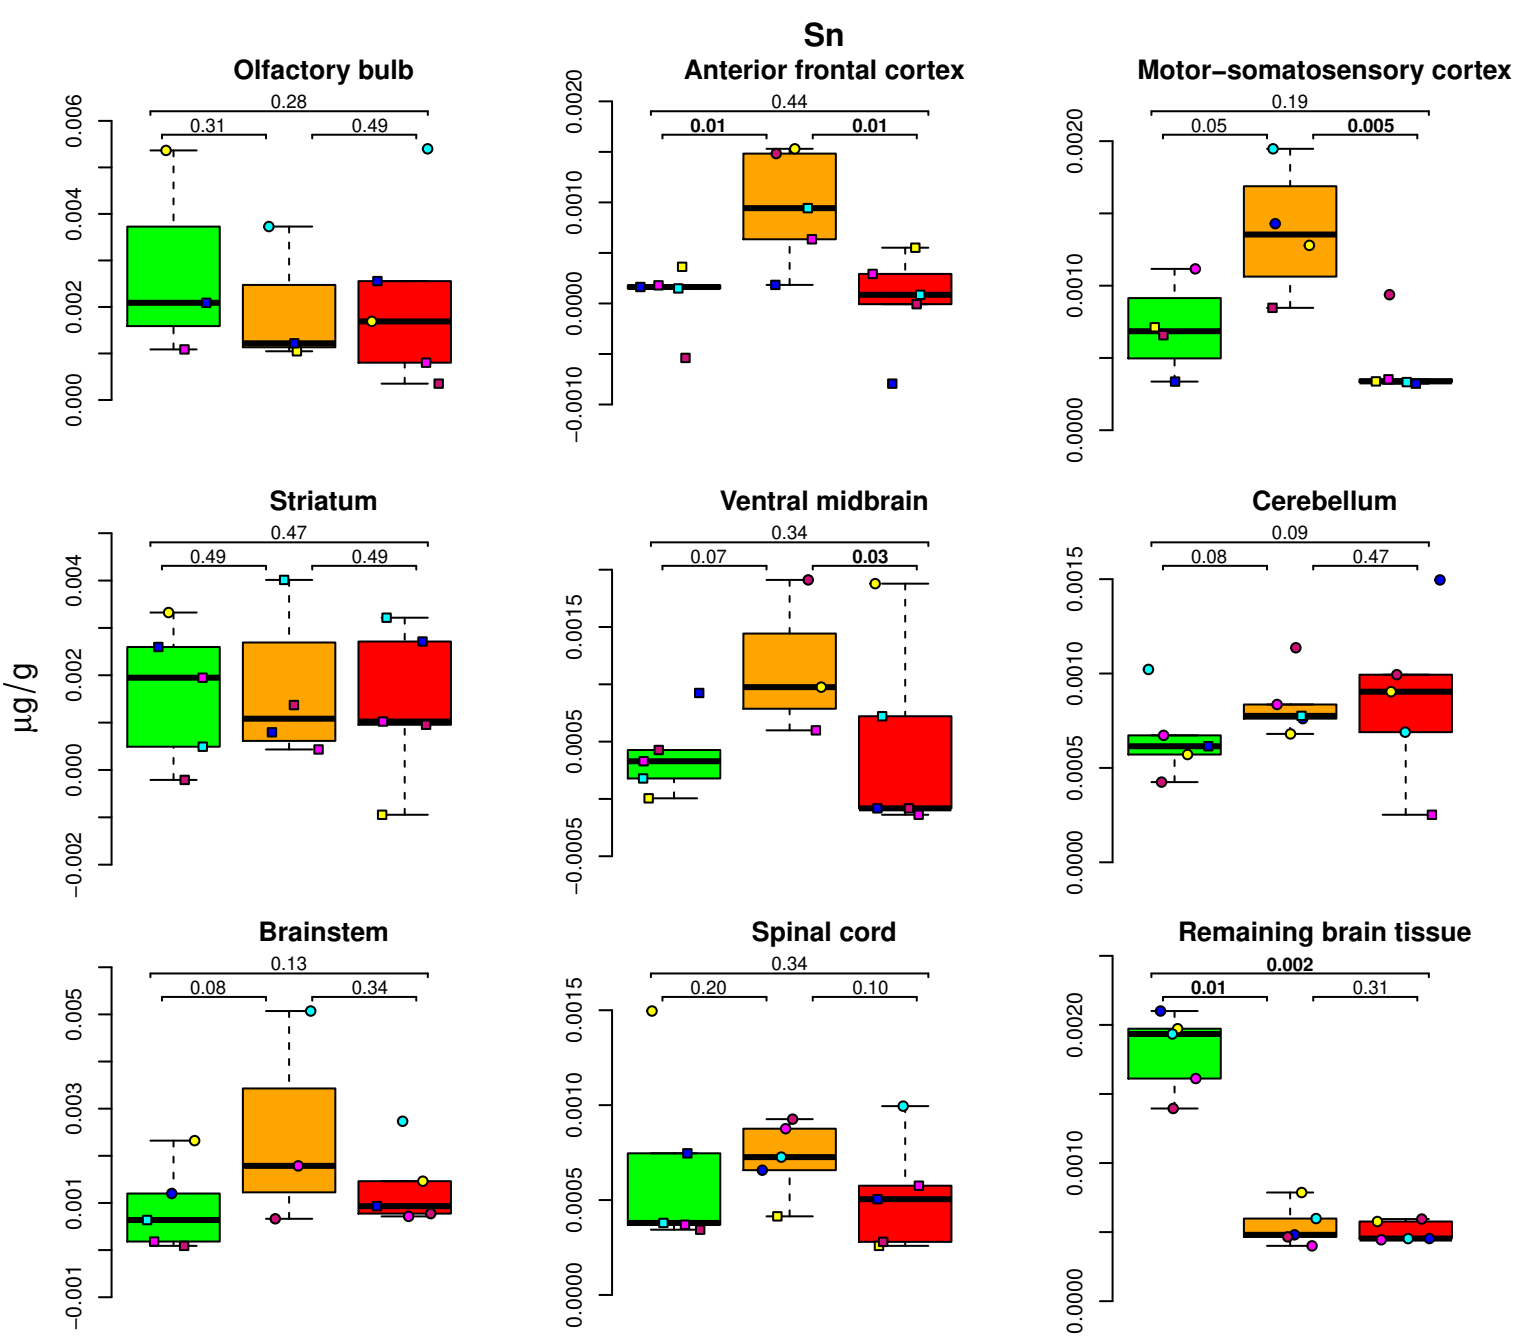

Supplement: NIHMS1723636-supplement-Fig_S10b.pdf [file NIHMS1723636-supplement-Fig_S10b.pdf]

**Sr**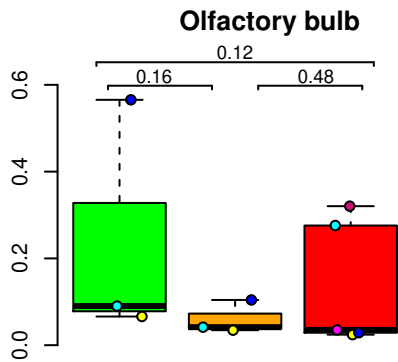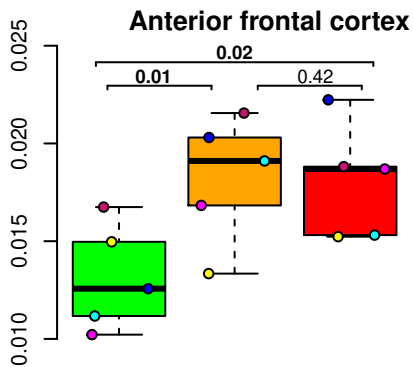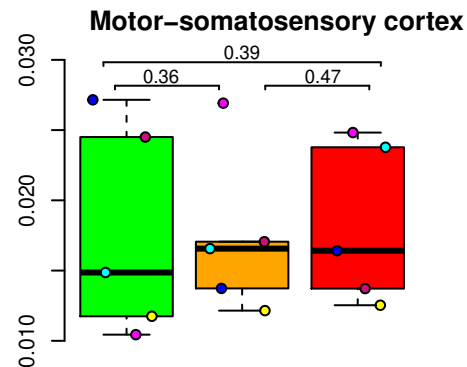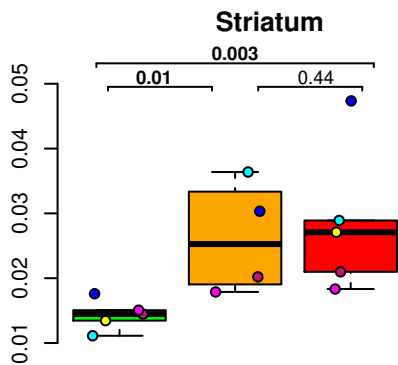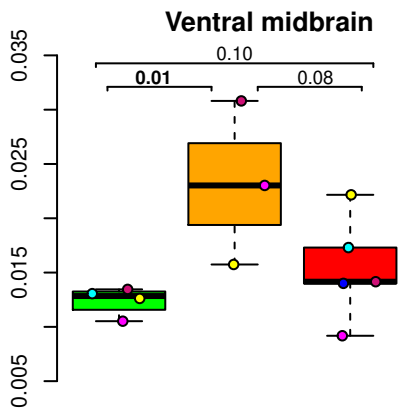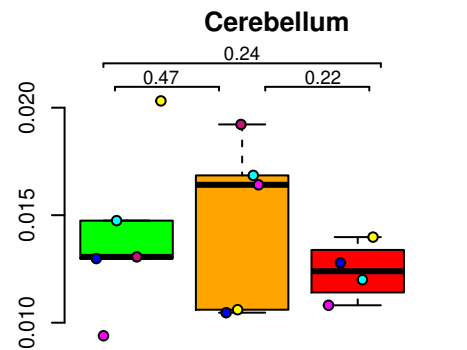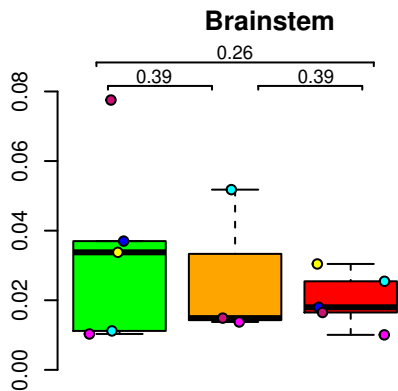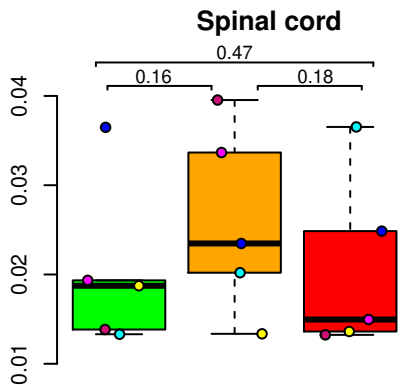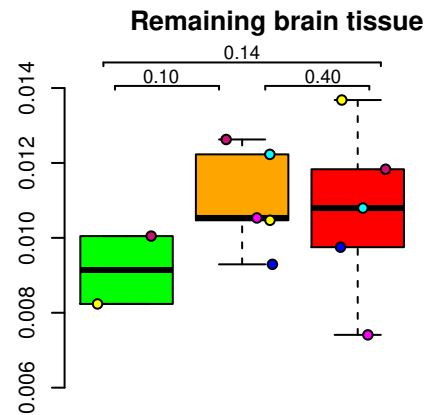 $\mu\text{g/g}$

Supplement: NIHMS1723636-supplement-Fig_S11a.pdf [file NIHMS1723636-supplement-Fig_S11a.pdf]

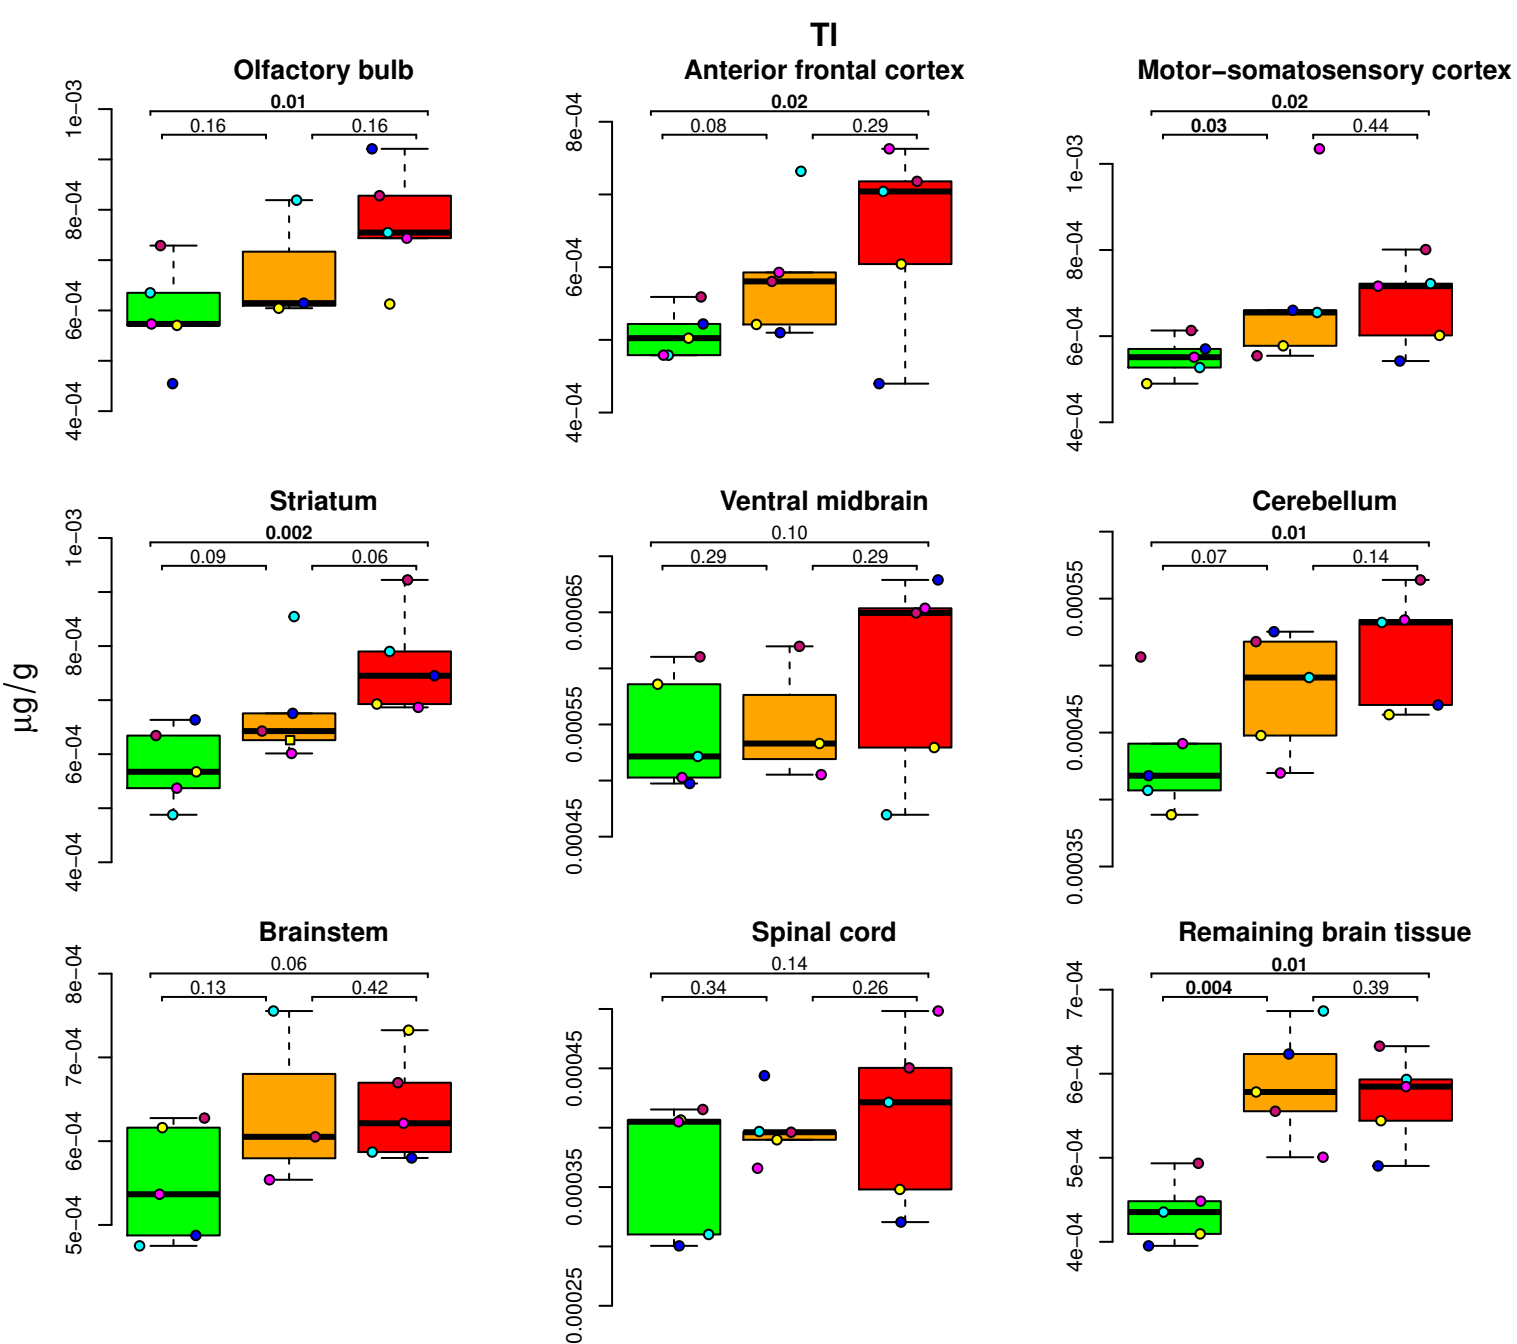

Supplement: NIHMS1723636-supplement-Fig_S11b.pdf [file NIHMS1723636-supplement-Fig_S11b.pdf]

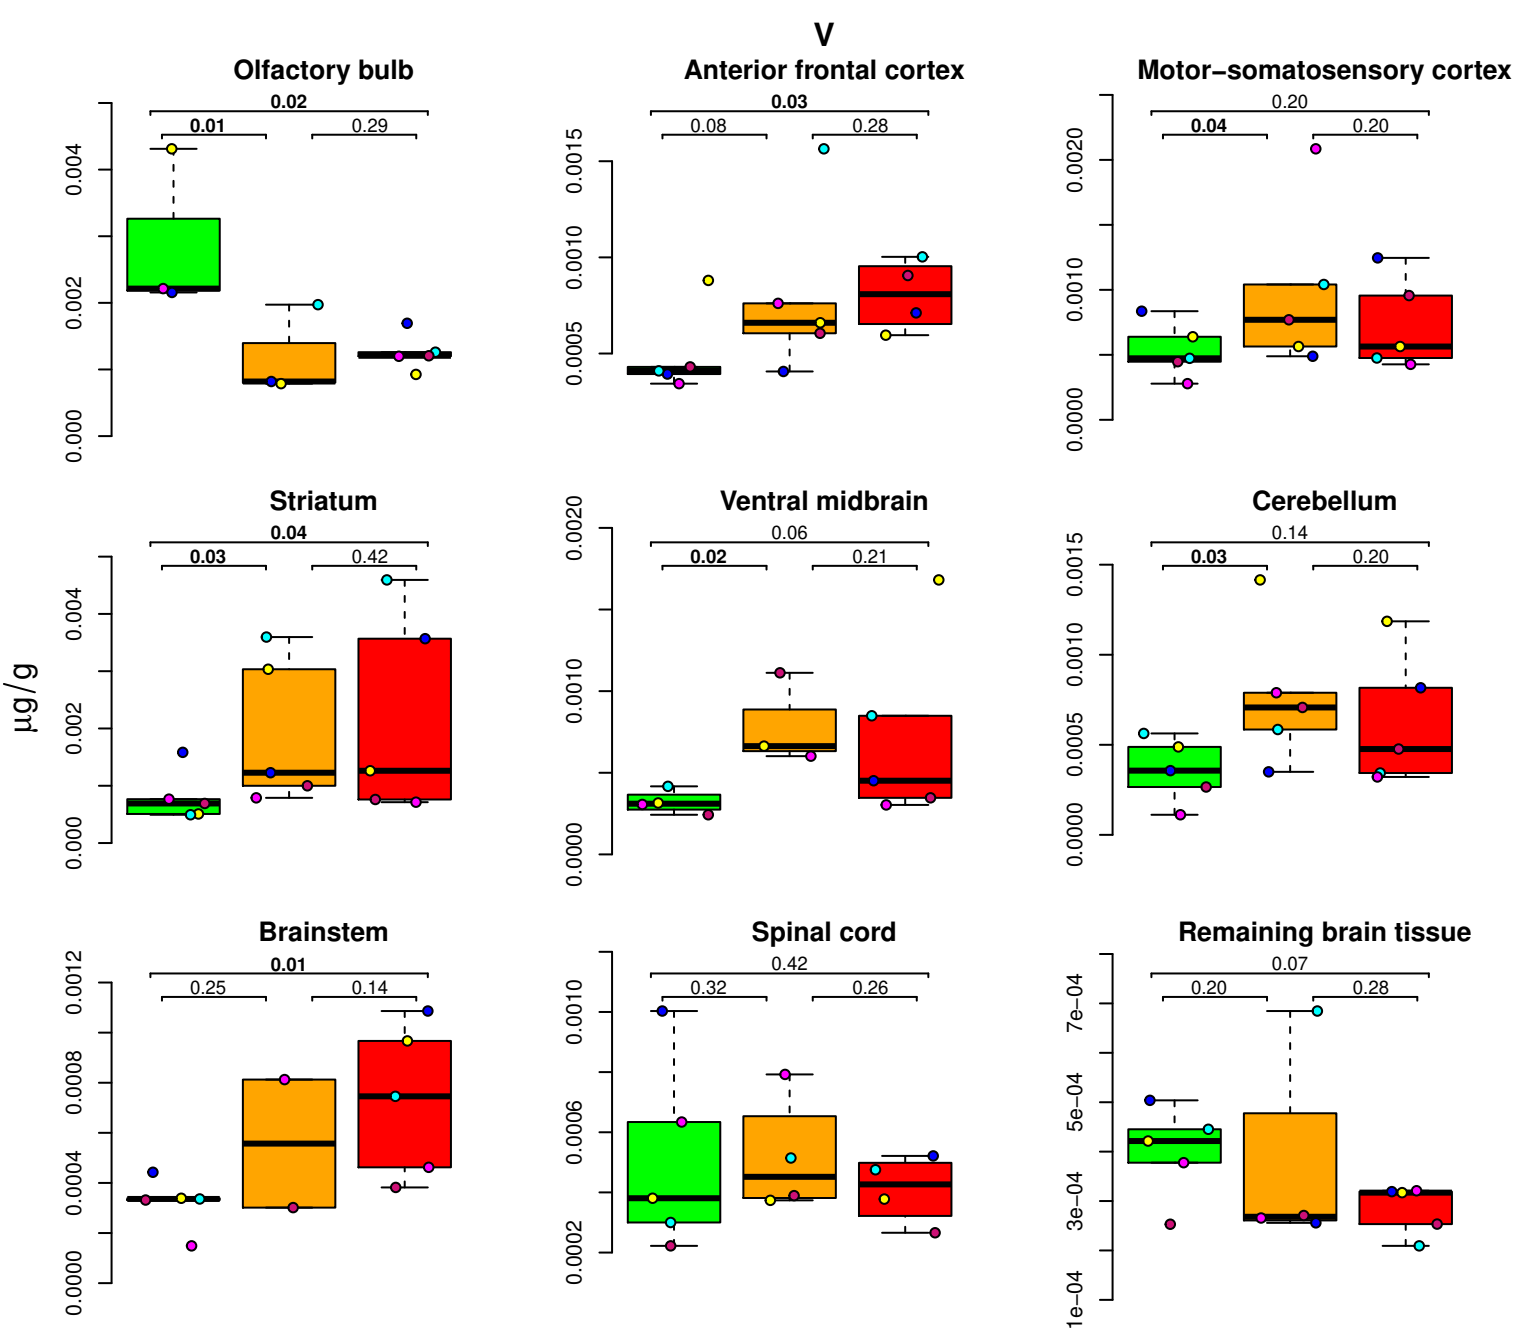

Supplement: NIHMS1723636-supplement-Fig_S12a.pdf [file NIHMS1723636-supplement-Fig_S12a.pdf]

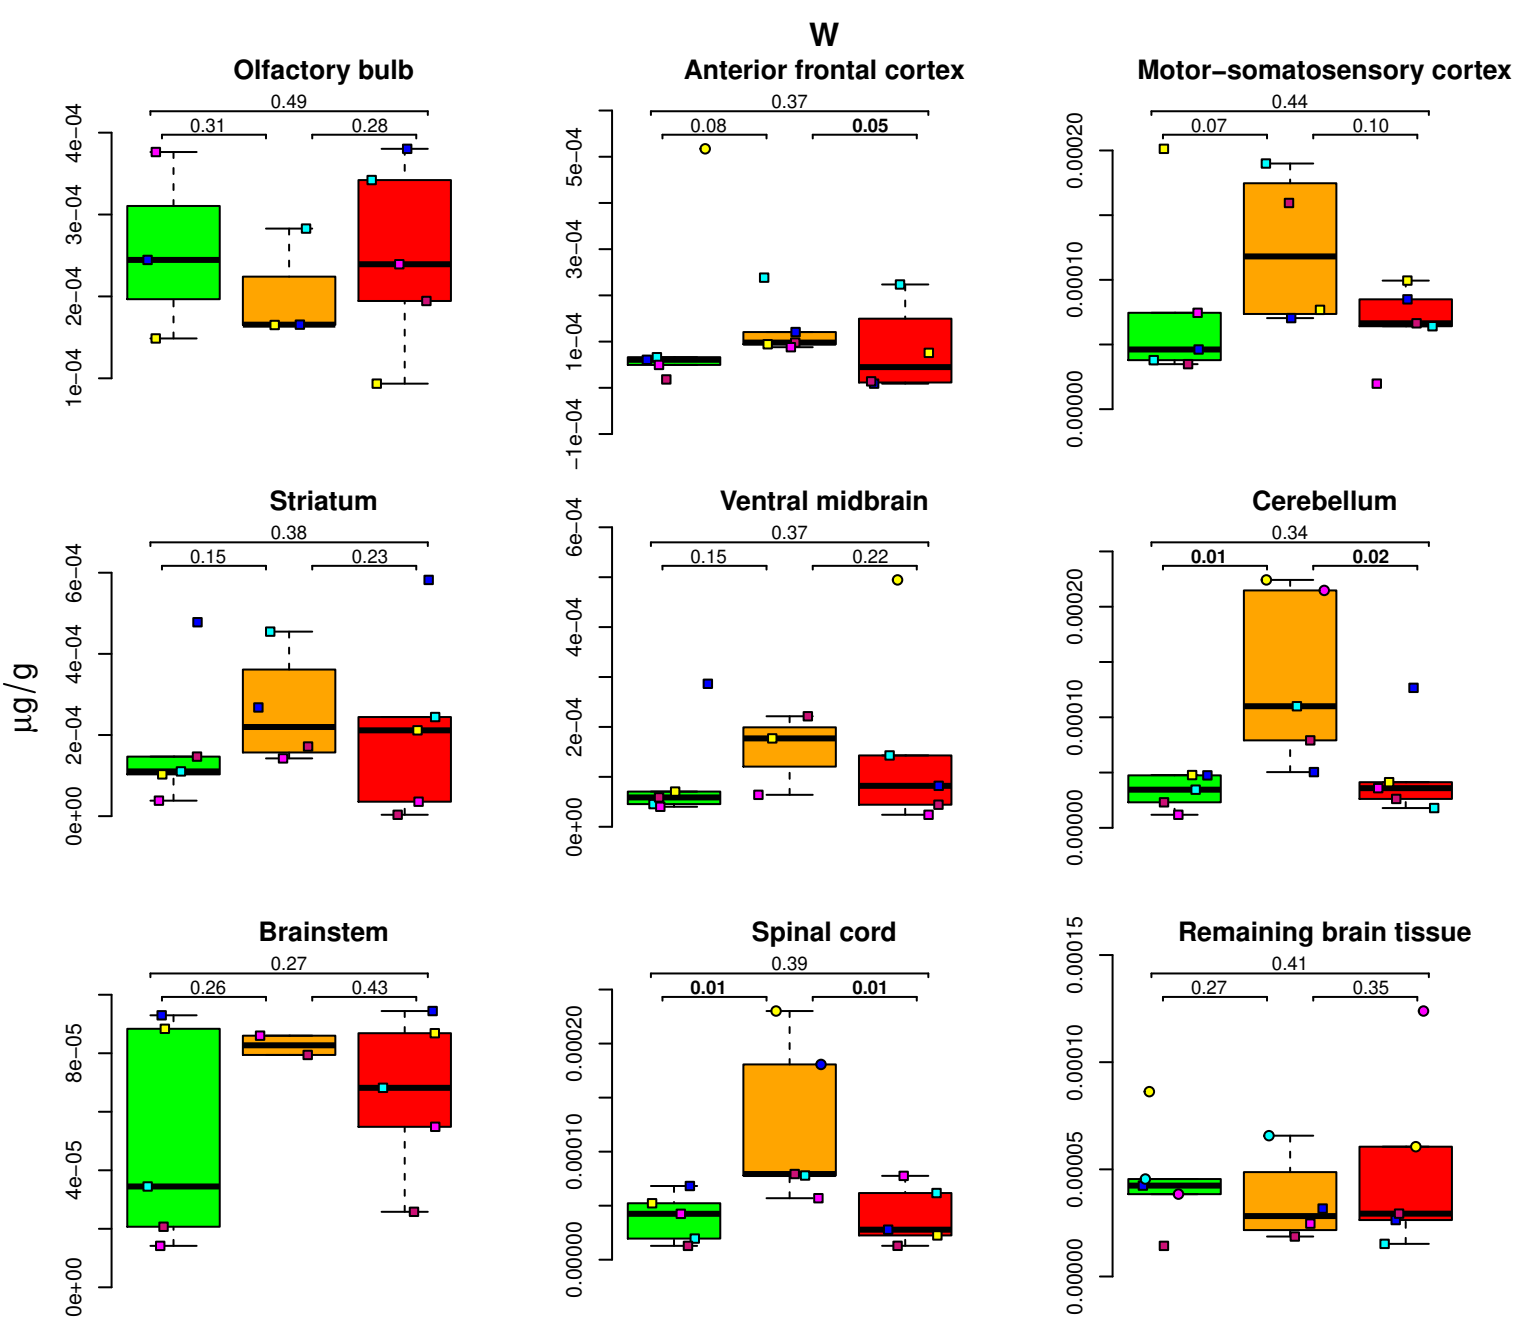

Supplement: NIHMS1723636-supplement-Fig_S12b.pdf [file NIHMS1723636-supplement-Fig_S12b.pdf]

Zn

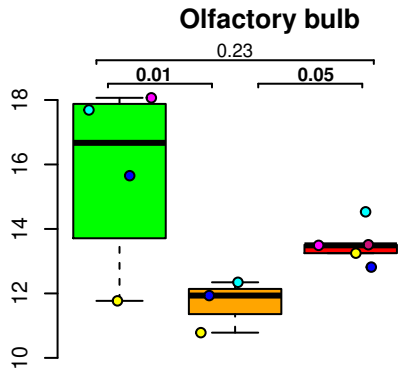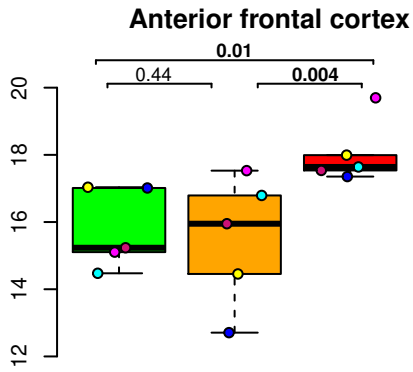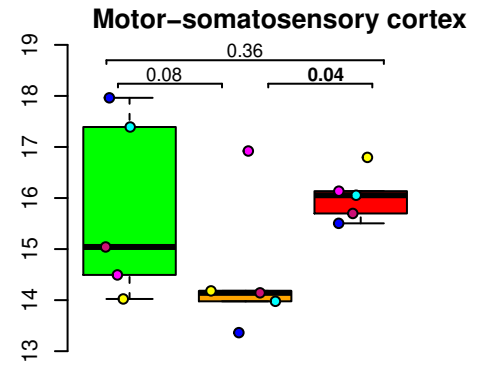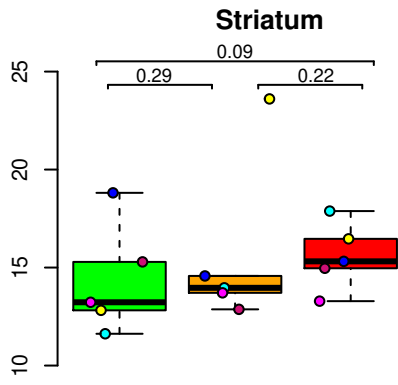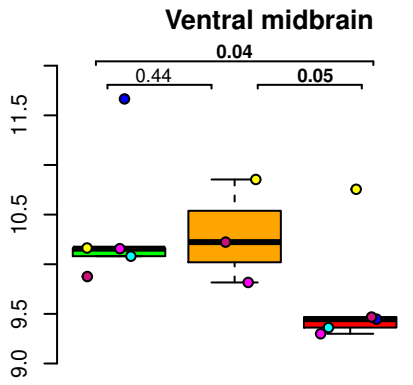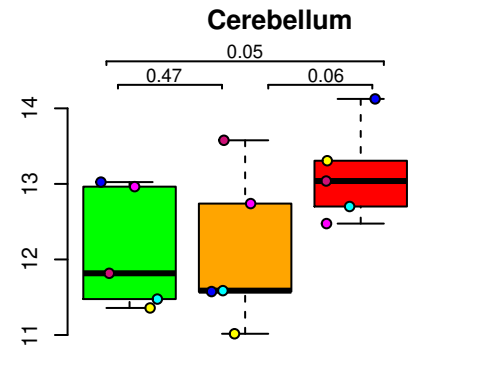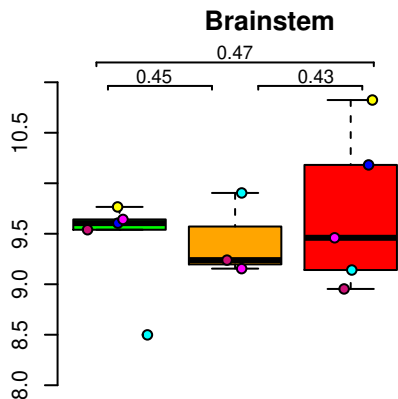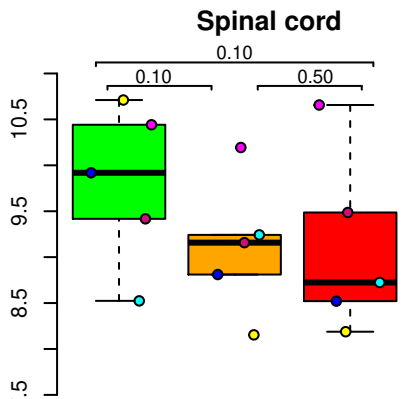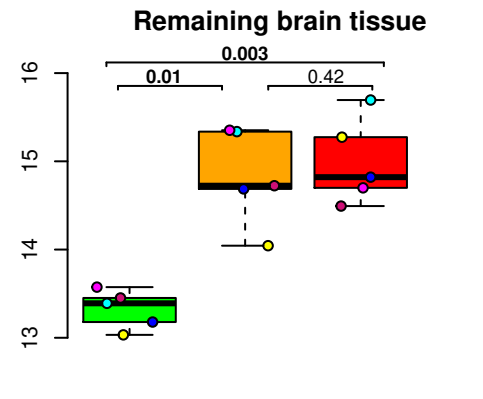

Supplement: NIHMS1723636-supplement-Fig_S13.pdf [file NIHMS1723636-supplement-Fig_S13.pdf]

$\mu\text{g/g}$

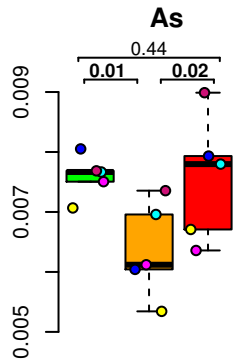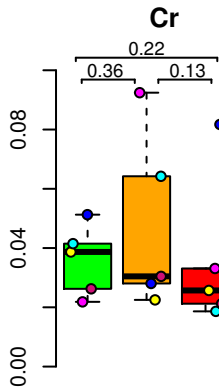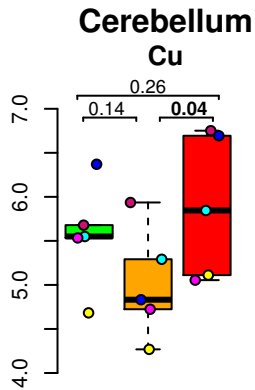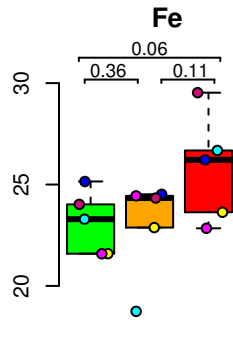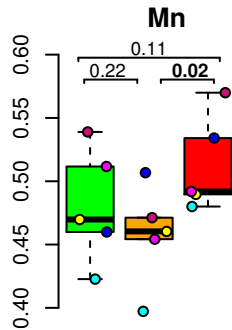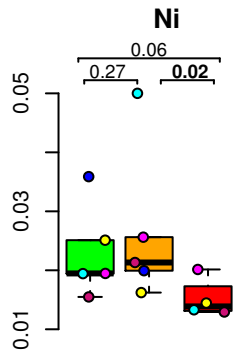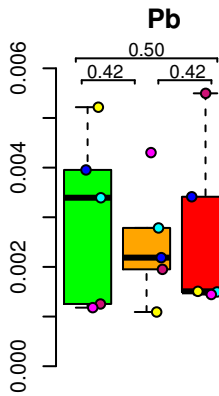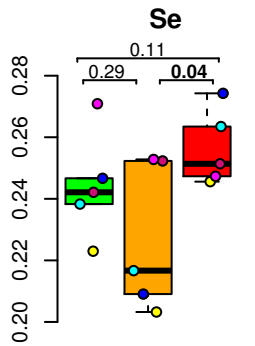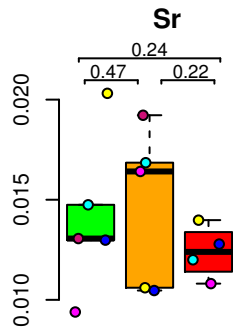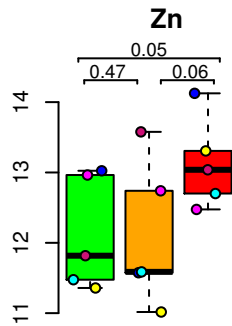

Supplement: NIHMS1723636-supplement-Fig_S2.pdf [file NIHMS1723636-supplement-Fig_S2.pdf]

$\mu\text{g/g}$

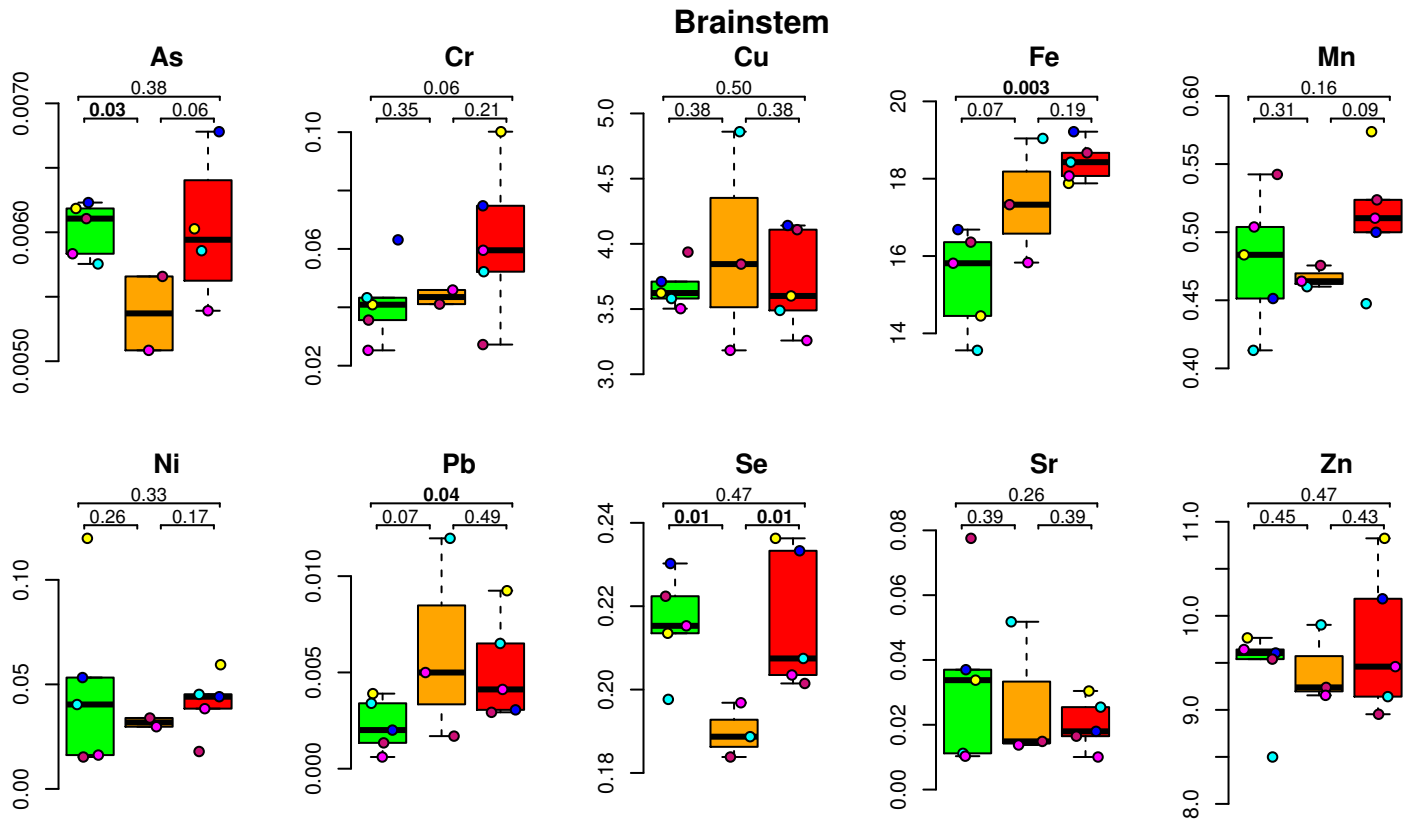

Supplement: NIHMS1723636-supplement-Fig_S3.pdf [file NIHMS1723636-supplement-Fig_S3.pdf]

$\mu\text{g/g}$

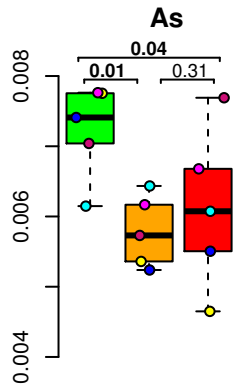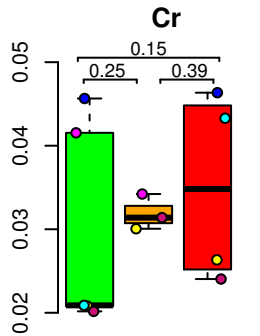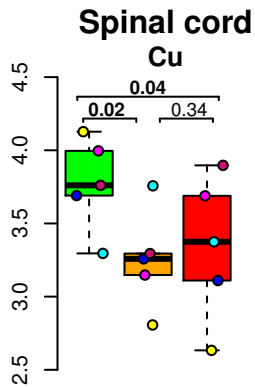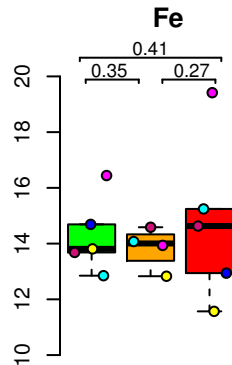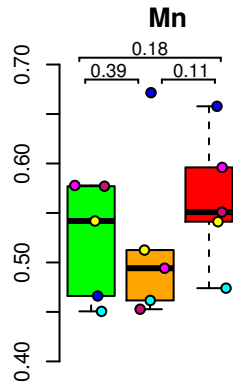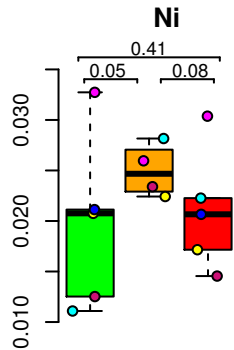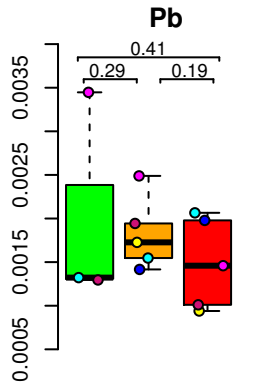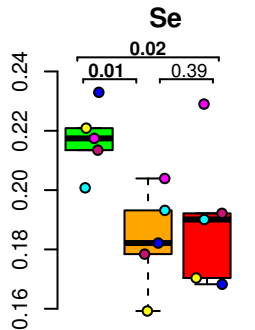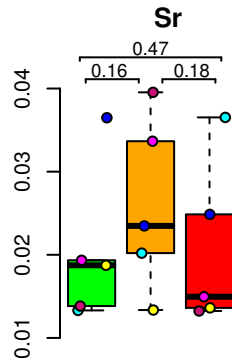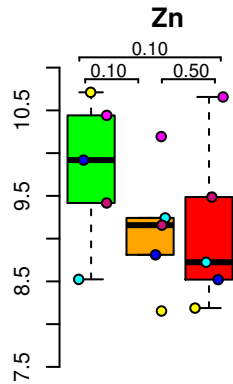

Supplement: NIHMS1723636-supplement-Fig_S4.pdf [file NIHMS1723636-supplement-Fig_S4.pdf]

$\mu\text{g/g}$

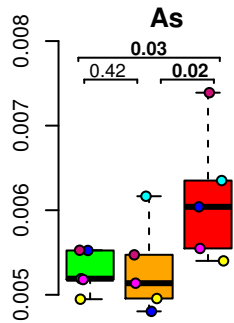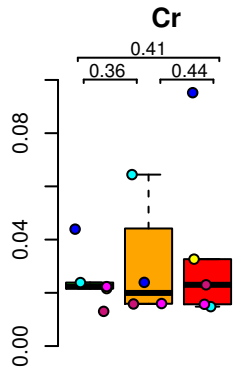

## Remaining brain tissue

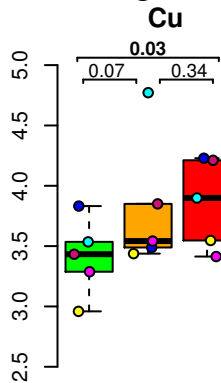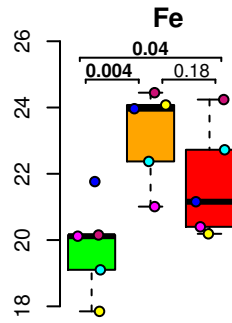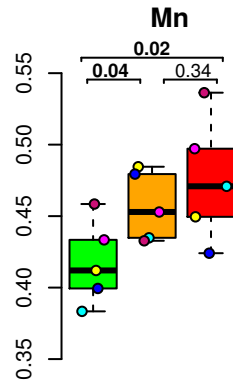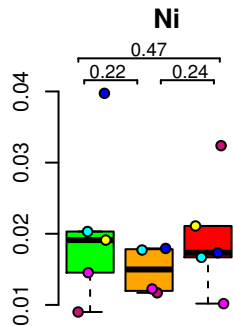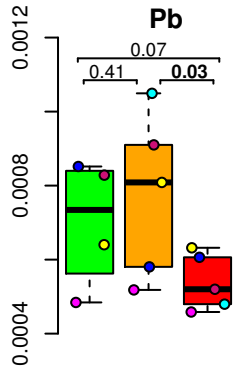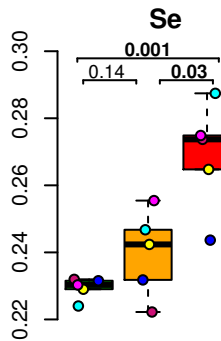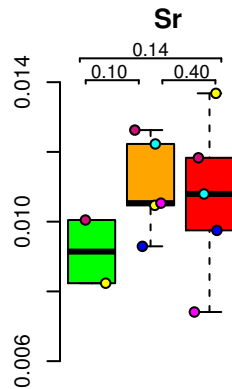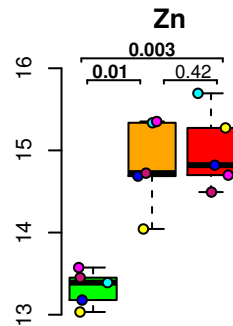

Supplement: NIHMS1723636-supplement-Fig_S5.pdf [file NIHMS1723636-supplement-Fig_S5.pdf]

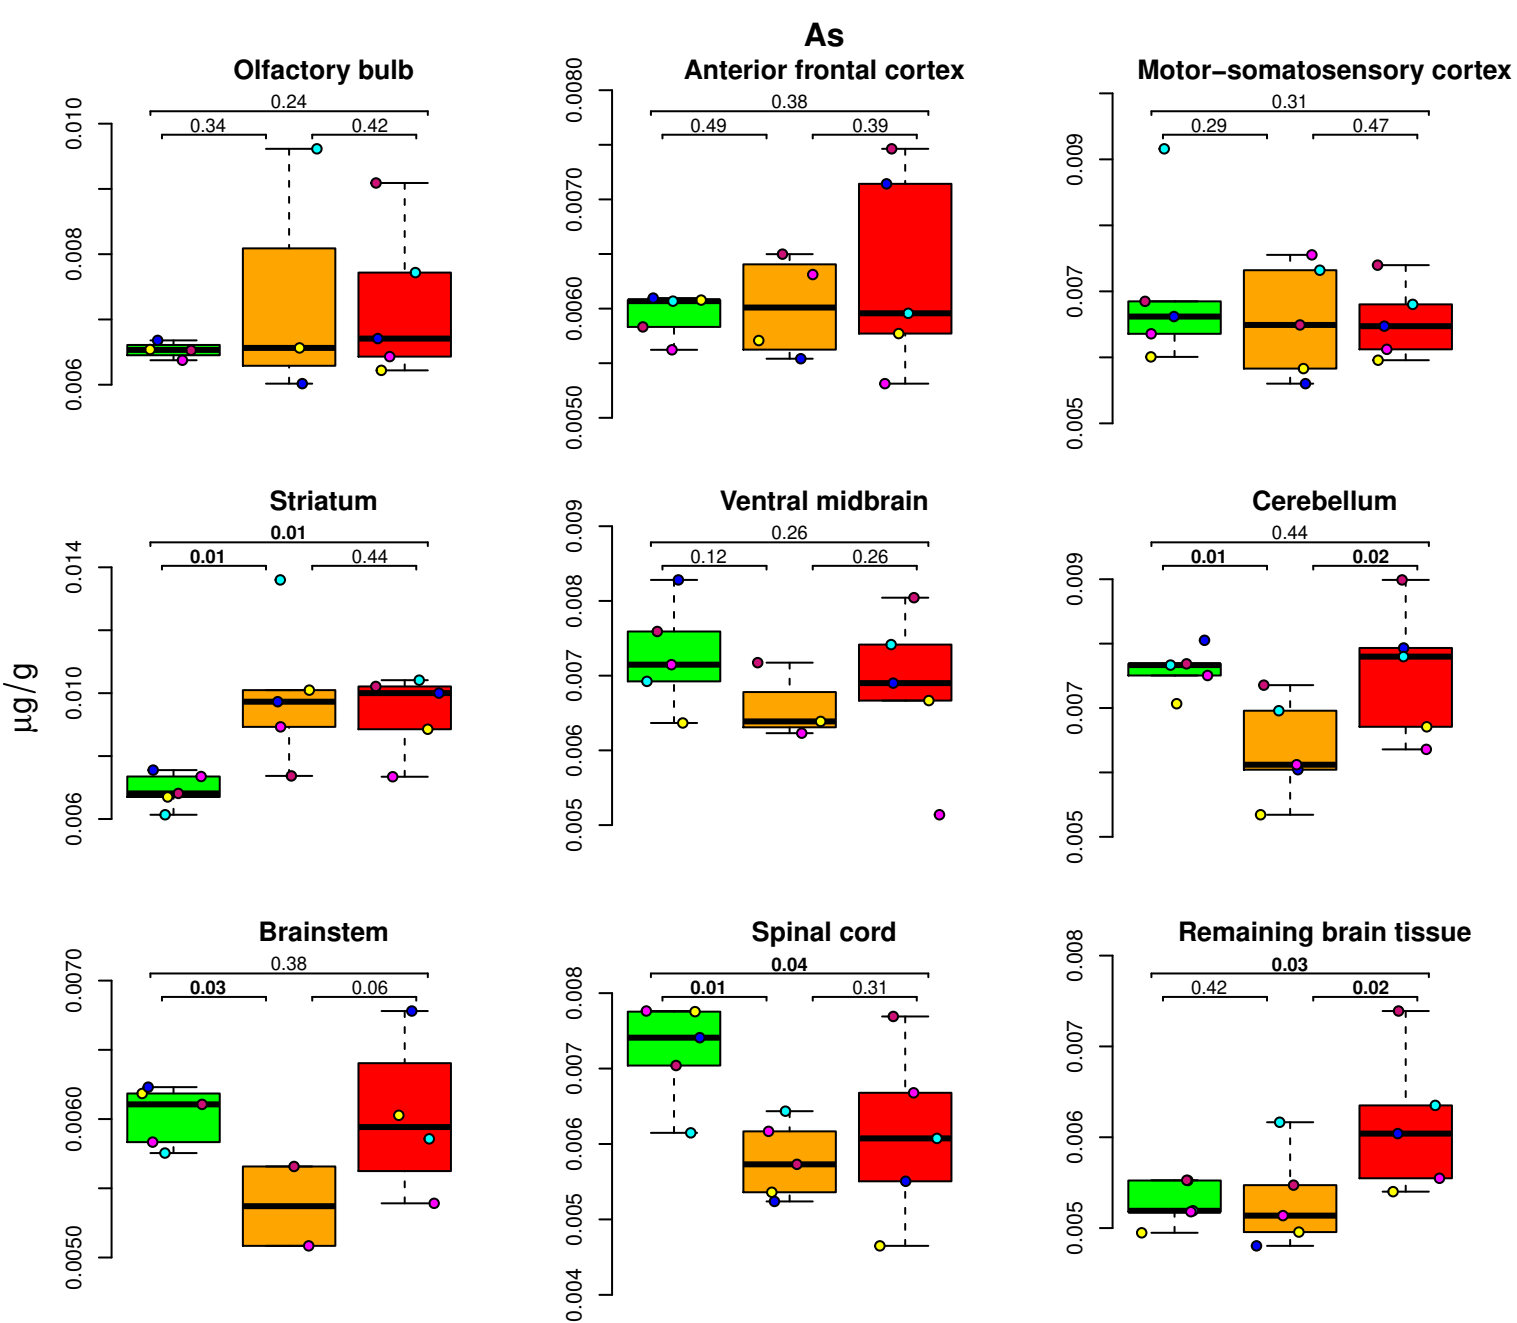

Supplement: NIHMS1723636-supplement-Fig_S6a.pdf [file NIHMS1723636-supplement-Fig_S6a.pdf]

# Cu

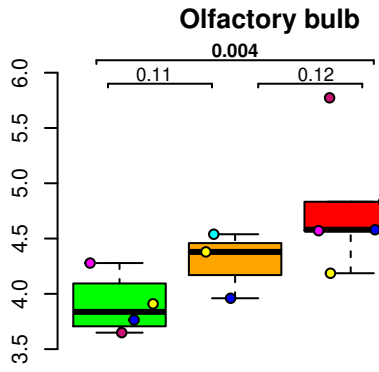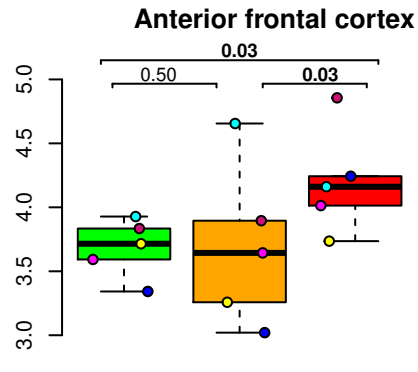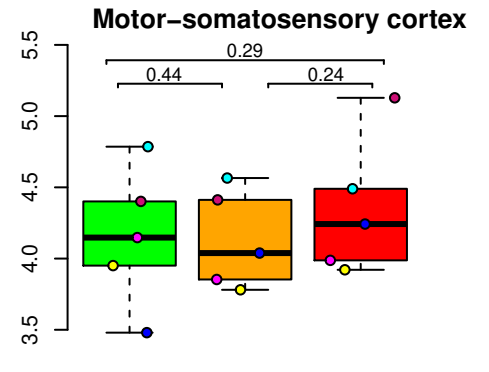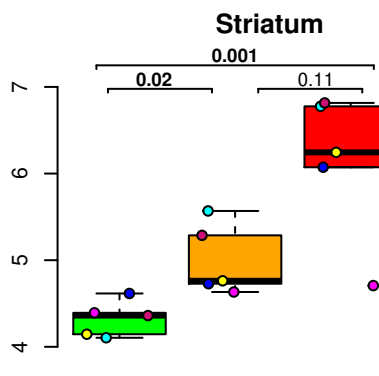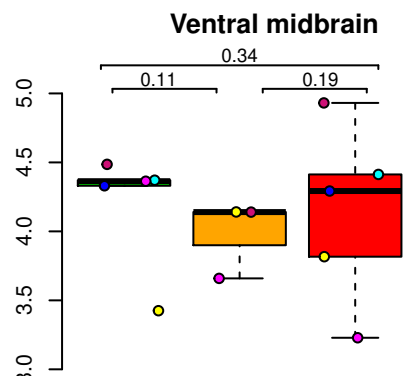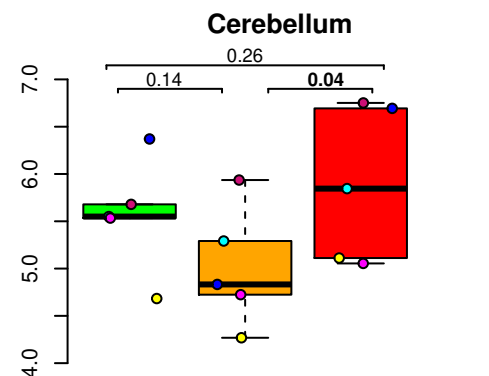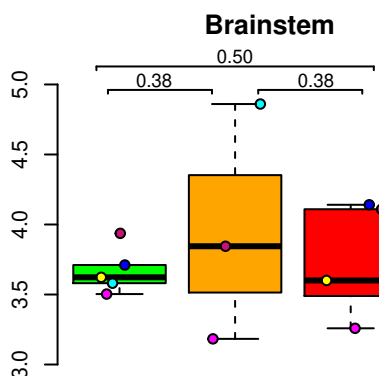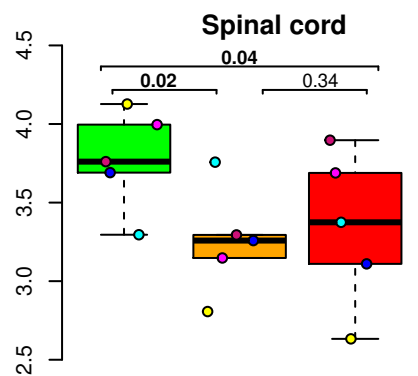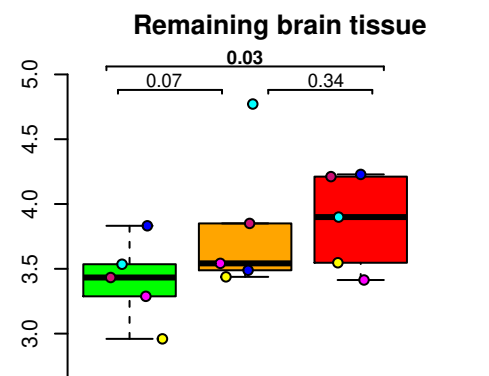

Supplement: NIHMS1723636-supplement-Fig_S7a.pdf [file NIHMS1723636-supplement-Fig_S7a.pdf]

# Fe

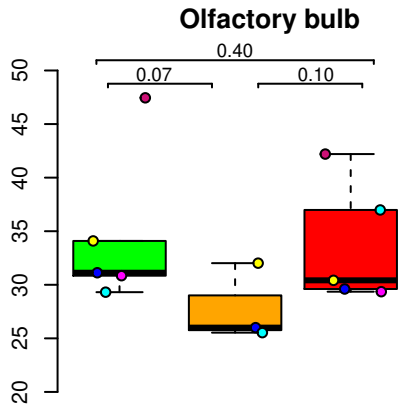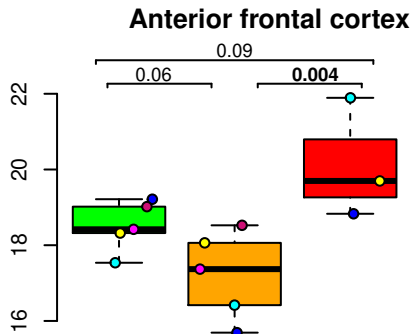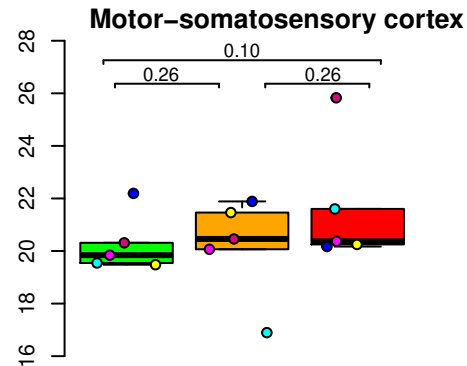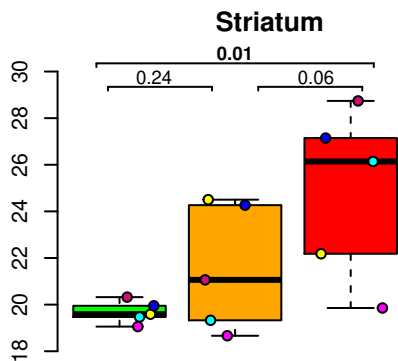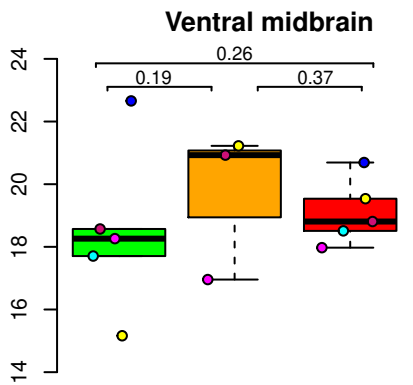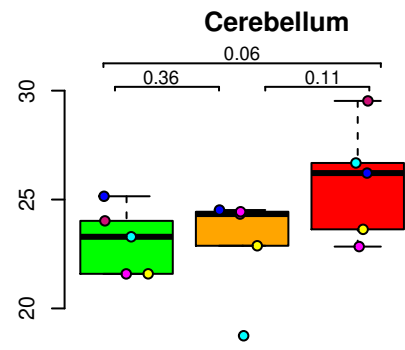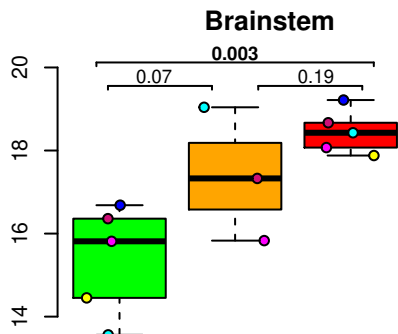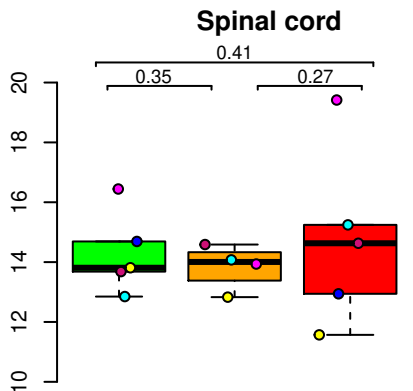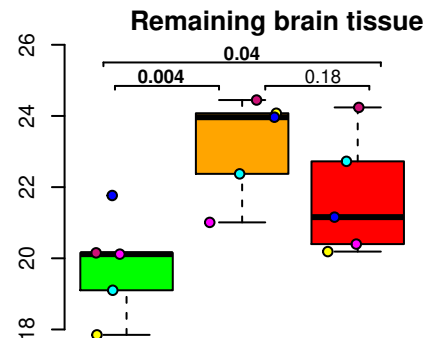

Supplement: NIHMS1723636-supplement-Fig_S7b.pdf [file NIHMS1723636-supplement-Fig_S7b.pdf]

Ni

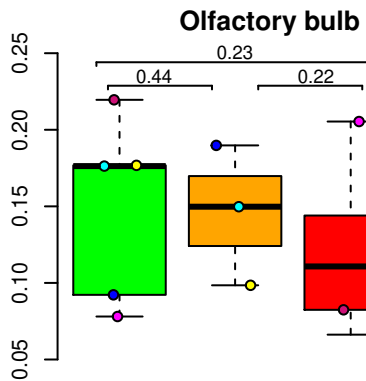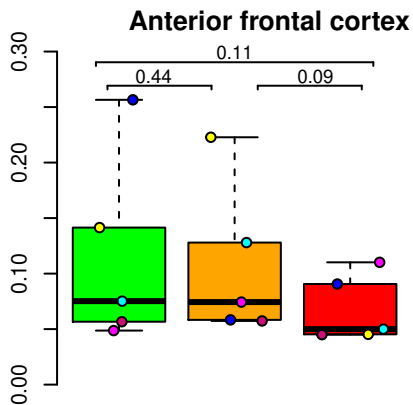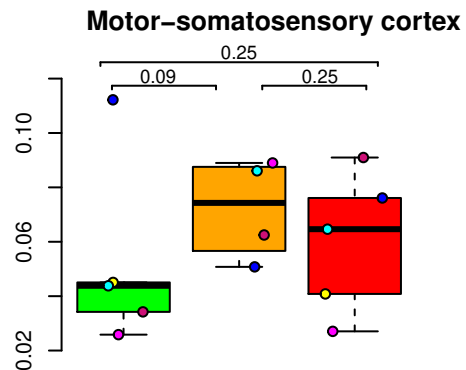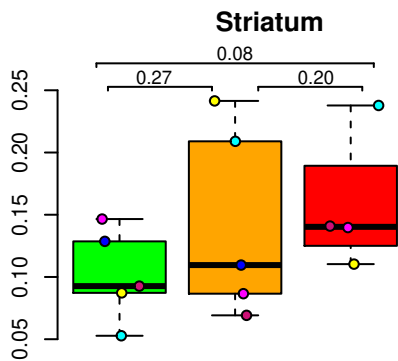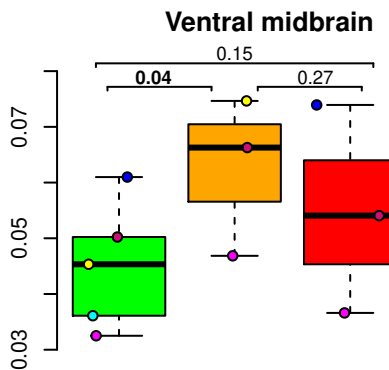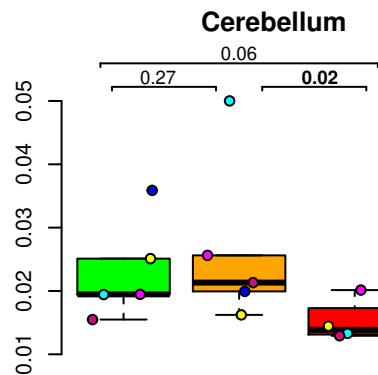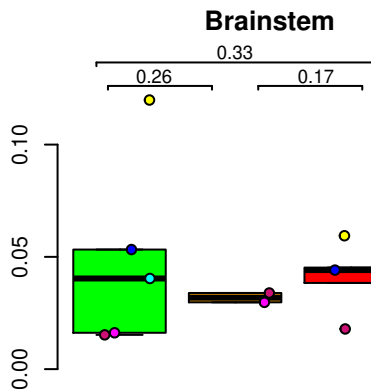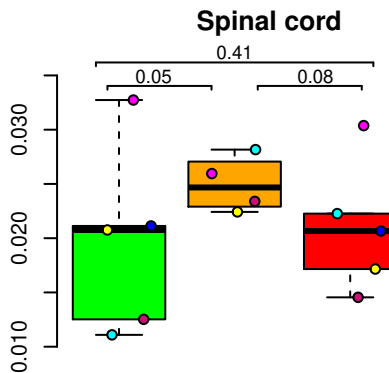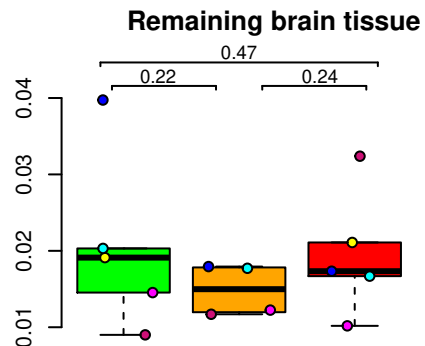

Supplement: NIHMS1723636-supplement-Fig_S8b.pdf [file NIHMS1723636-supplement-Fig_S8b.pdf]

# Pb

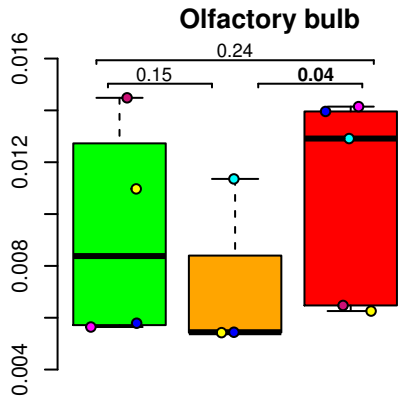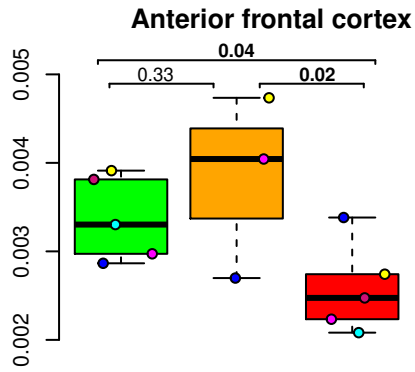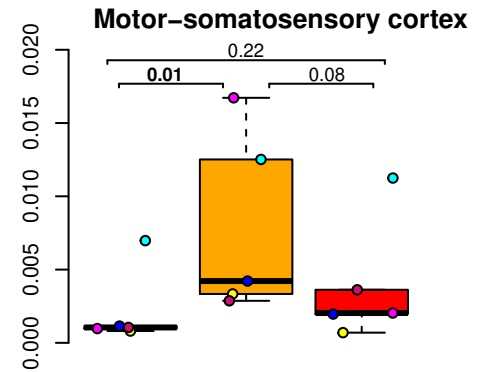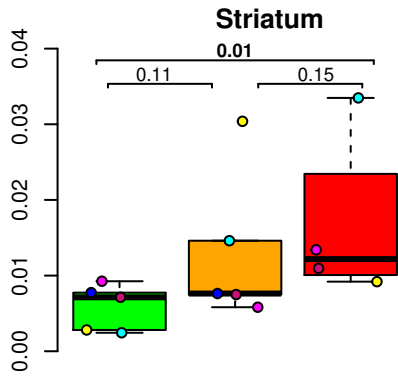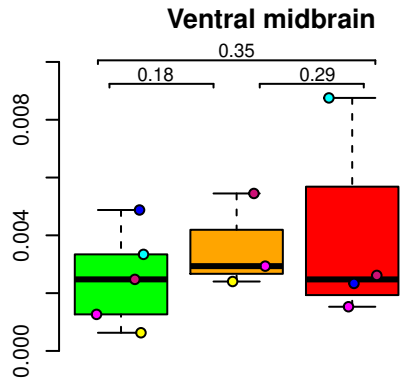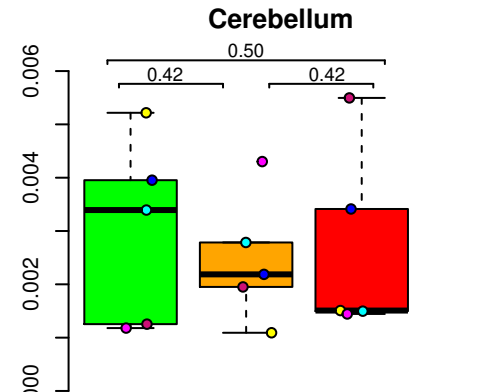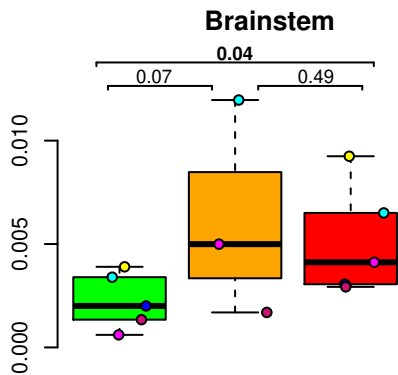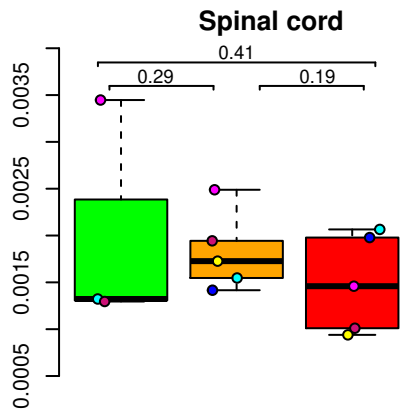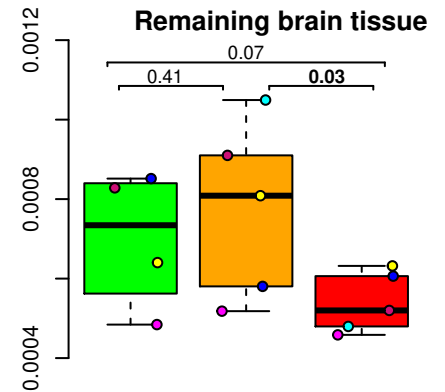

Supplement: NIHMS1723636-supplement-Fig_S9a.pdf [file NIHMS1723636-supplement-Fig_S9a.pdf]
